# Supplementary material for: Coevolution Pattern and Functional Conservation or Divergence of miR167s and their targets across Diverse Plant Species
Source: PubMed Central journal article supplement (PMC4602222; doi:10.1038/srep14611), 2015-10-13
Supplement: srep14611-s1.pdf [file srep14611-s1.pdf]

**Coevolution Pattern and Functional Conservation or Divergence of miR167 and their targets across Diverse Plant Species**

Suvakanta Barik, Ashutosh Kumar, Shabari SarkarDas, Sandeep Yadav, Vibhav Gautam, Archita Singh, Sharmila Singh and Ananda K. Sarkar

**Supplementary Figure S1.** A NJ phylogeny of miR167s using MEGA5. The tree is divided into group I and group II. The group I contains three miR167-3p sequences, whereas all other miRNA167s (-5p) belong to the group II. The scale bar represents the nucleotide substitution rate.

**Supplementary Figure S2.** Multiple sequence alignment between UTS-2a (target of UmiR167-2), Osa-NBS-LRR (japonica rice cultivar-group) and Osa-NB-ARC (indica rice cultivar-group).

**Supplementary Information S3.** Novel target sequences and their cleavage or complementarity with miR167s. (A) Target sequence of mdm-miR167a and sequenced 5' RLM RACE PCR products (with ligated RNA adapter). The *Mdm-CNBL10* gene sequence has complementary binding sites (yellow) and cleavage sites (where underline starts within mRNAs) and primer location have been indicated. (B) Complementarity between UmiR167-7 and *Gma-MCCC* and red arrow shows cleavage site. The *Gma-MCCC* gene sequence has complementary binding sites (yellow) and cleavage sites (where underline starts within mRNAs) and primer location have been indicated. (C) Complementarity between UmiR167-8 and *Gma-LRPK* and red arrow shows cleavage site. The *Gma-LRPK* gene sequence has complementary binding sites (yellow) and cleavage sites (where underline starts within mRNAs) and primer location have been indicated



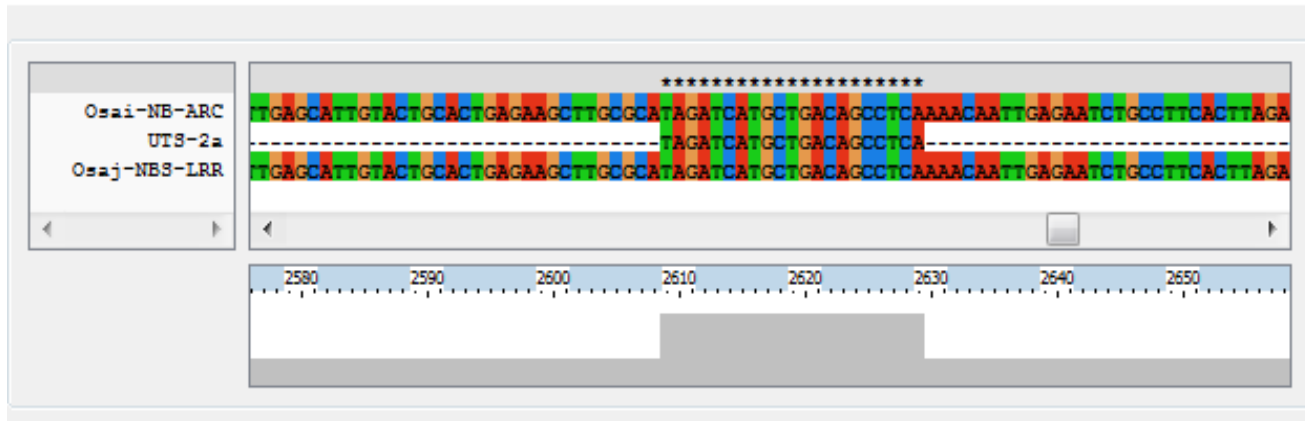

Supplementary Figure S2

## Supplementary Information S3

### S3A. Target sequence of mdm-miR167a and sequenced 5' RLM RACE PCR products

#### *Mdm-CNBL10* sequence

>gi|657971446|ref|XM\_008379288.1| PREDICTED: Malus x domesticacalcineurin B-like protein 10 (LOC103440590), mRNA

5' AGCAAATKTATAATCCGCGCCAGCGGCGGAGAGAGAAGCAGCCCCTCGAAGCCTTCTGGTGCA  
CCCGAGGACATTTTTCATYGAAAAGCACAAAGGCACAGAAGAAGTAGCCTCKATCTGATGAATTGT  
TGCAGACGACAGCAATGGAATTCTCGAGATCGAGTTCGTTATCAATCGGAGAGAAGATCTGCGCG  
GCGTTTATAACCGTTTGTAGCTATGGTAGAGGCGCTGGTTTTCGCCGTGAGCGGTTGCTGCAGCCAC  
CGTTCCYGCCGCCAATCAACCGCGTTTCGCTTGGCGCTATATGTCTCACCTCGCCGATGAAACC  
AGATTTACTGTTAATGAGCTGGAGGCGTTGTATGAGCTTTTTAAGAAGCTGAGCAGCTCGATTATC  
GACGACGGATCGATTACAAGGAGGAGCTTCAATTAGCACTATTTCAAACCTCCCAAGGCGAAAA  
TCTGTTCCTTGACCGGGTTTTTGATCTATTTGATGAAAAGAAAAATGGTGTCAATTGAATTTGATGAG  
TTTGTTTCATGCACTCAATRTCTTCCATCCTTACGCCCTATTGATGACAAAATCGATTTTGCATTT  
GGCTGTATGATCTGAGACAAACCGGATTCATTGAGMGAGAAGAGGTTAAGCAAATGGTGATTGCC  
ATATTGATGGAATCCGACGTGAAATGCGCGAT<sup>X</sup>GATATTCCTTGAGGAAATCATTGAGAAGACATT  
TGCCGACGCTGATGCTGACAAAGATGGGAAAATTAACAAAGAAGAATGGAAGGTTTTCTGCTTC  
GGCATCCATCGCTTCTAAAAAACATGACTCTTCCTTATTTGAAGGACATCACGACAGTATTTCCGA  
GTTATATTTTTACACCGAAGTTGAAGACTGAGCATTGAAAGCCTTTTCTACAGAGGATCTTTA  
GAAGAAGAGCATAATTCCAAGCTCCTGCGTATTGCGGAGATACTTCCATCAATTCAAAGGGGGW  
MACATCCGAGTTTTAGGCAAGGCCGGGATGGC -3'

(Note: <sup>X</sup>: cleavage site by mdm-mR167a).

#### 5' RLM RACE PCR products (from band at ~316 bp)

##### Sequence 1

>Mdm-CNBL10-Seq1  
GAACACGAAAACCTTCCATTCTTCTTTGTTAATTTTCCCATCTTTGTCACATCA  
CGTCGGCAAATGTCTTCTCAATGATTTCTCAAGAATATCTTTCTACTCCTTCA  
GTCCATGTCAGTGTCCAC

##### Sequence 2

>Mdm-CNBL10-Seq2  
CGATGGATGCCGAAGCACGAAAACCTTCCATTCTTCTTTGTTAATTTTCCCATC  
TTTGTCAGCATCAGCGTCGGCAAATGTCTTCTCAATGATTTCTCAAGAATATC  
TTTCTACTCCTTCAGTCCATGTCAGTGTCC

### S3B. Sequence alignment of gma-miR167h and its target *Gma-MCCC*

|                 |      |                       |      |
|-----------------|------|-----------------------|------|
| gma-miR167h     | 21   | UCAACUUCGACGGUCGUACUA | 1    |
|                 |      | .....                 | ::   |
| <i>Gma-MCCC</i> | 1810 | AGUUGAAGCUGCUGGUGUAAU | 1830 |

***Gma-MCCC* sequence**

>TC440662 UniRef100\_Q42777 Cluster: Methylcrotonoyl-CoA carboxylase subunit alpha, mitochondrial precursor; n=1; Glycine max|Rep: Methylcrotonoyl-CoA carboxylase subunit alpha, mitochondrial precursor - Glycine max (Soybean), complete

GGCACCAACCTCCATGGCTTCTCTGGCGTTGCTCCGCAGAACCACGCTCTCCCAC  
TCGCACGTGCGTGCACGAGCCTTCTCTGAGGGGAAGAGCAGCAACAGACACCGC  
ATCGAGAAGATTCTAGTAGCCAACCGCGGTGAAATCGCTTGCAGGATCACGAGG  
ACCGCGCGGAGGCTCGGCATTCAAACCGTCGCCGTTTACAGCGACGCCGACAAG  
GACTCGCTCCACGTTGCGTCCGCCGACAAGGCCATCCGAATCGGACCGCCACCG  
GCGCGGCTCAGTTACTTGAACGGAGCCTCCATCGTCGACGCCGCCATTTCGCTCCG  
GCGCGCAGGCTATTCACCCTGGGTATGGATTCTTGTTCGGAGAGTGCTGACTTCGC  
CAAGCTCTGTGAGGAGAGTGGTCTCACTTTTATAGGGCCTCCTGCGTCTGCTATT  
CGAGATATGGGTGACAAGAGTGCATCGAAGAGAATAATGGGAGCTGCAGGTGTG  
CCTCTTGTACCTGGATATCACGGATATGATCAAGATATTGAAAAAATGAAGTTGG  
AAGCTGATAGAATTGGATATCCAGTCCTAATTAAGCCAACCTCATGGTGGAGGTG  
GAAAGGGTATGAGGATTGTACACACTCCAGATGAGTTTGTGTAATCCTTCTTAGC  
TGCACAACGGGAAGCAGCTGCTTCTTTGGCGTCAACACAATATTGTTGGAGAAG  
TATATTACACGGCCAAGACACATAGAAGTCCAGATATTTGGGGATAAGCATGGG  
AATGTTCTGCATTTGTATGAGCGAGATTGCAGTGTTTCAGAGAAGACACCAAAAA  
ATAATTGAAGAAGCTCCAGCTCCAACATTTCTGCTGACTTTCGTGCACAATTGG  
GTGTAGCCGCTGTTTCAGCTGCAAAGGCAGTTAATTATTACAATGCTGGGACTGT  
GGAGTTTATAGTTGATACAGTCTCTGATGAATTTTACTTTATGGAGATGAATACA  
CGTCTTCAGGTTGAGCATCCTGTTACAGAAATGATTGTTGGTCAGGATCTTGTG  
AATGGCAAATCCTTGTGCCAATGGAGAAGCTCTTCCATTGAGTCAATCACAAGT  
ACCCTTATCAGGTCATGCTTTTGAAGCTCGAATCTATGCTGAAAATGTTCAAAAA  
GGGTTTCTTCCAGCAACTGGAGTTCTACACCATTATCATGTTCCAGTCTCATCTGC  
AGTCCGAGTGGAGACTGGAGTTAAAGAAGGAGACAAAGTTAGCATGCACTATGA  
TCCTATGATTGCTAAGCTTGTGGTGTGGGGAGAAAATCGTGCTGCTGCCTTGGTC  
AAACTGAAGGATAGTTTGTCAAAGTTTCAGGTTGCAGGTCTGCCAACCAATGTCC  
ACTTCTTCAAAGCTTGCTAATCACAGGGCATTGCAATTGGCAATGTGGAGAC  
TCATTTTATTGATAACTACAAAGAAGACCTCTTTGTTGATGCTAACAATTCAGTGT  
CTGTGAAAGAAGCATATGAAGCTGCTAGACTTAATGCATCCCTGGTGGCCGCAT  
GCCTCATTGAAAAGAGCATTTTCATATTGGCTAGAAATCCACCTGGGGGCAGCA  
GCTTGCTCCCTATATGGTATTCTTCTCCACCTTTCAGAATCCATCATCAAGCTAAG  
CGTAGAATGGAACCTGAGTGGGATAATGAATATGGTAGTGGTAGCTCAAAGATC  
ATGAAGCTTACCATCACTTATCAGCCTGATGGGAGATACCTAATTGAGACAGAA  
CAAAATGGATCTCCTGTTTTAGAAGTGAAATCAACATATGTAAAAGATAACTATT  
TTAGAGTTGAAGCTGCTGGTGTAAATCAATGATGTTAATGTAGCTGTTTATTCAA  
GGATCAAATAAGGCATATTCATATTTGGCAAGGGTCCTGTCATCATTATTTCAGA  
GAGAACTAGGCCTGGAGCTGTCTGAGGATGAAGAATCCCAACATAAACCCAAA  
GTTGAAACATCAGCCAACCCTCAAGGGACAGTTGTAGCACCCATGGCAGGCTTG  
GTAGTTAAGGTTCTAGTGGAGAACAAGACAAGAGTGGAGGAAGGACAACCTGTG  
TTAGTATTGGAAGCAATGAAGATGGAGCATGTTGTAAAGCACCTTCTTCTGGCTA  
TGTGCATGGGCTTCAACTTATGGTGGGTGAACAGGTTTCAGATGGCAGTGTCTT

TTCAGTGTAAGGATCAATAAAAATCGCACTTGACAGCTTTACGCCAAGACTTTGG  
 CAAGGGGGACATTATCTGGAATTCTGGATGGATAGTTATACGCAGGTTAACAAC  
 CGAACACCCGAACACCTGGGAGTTGATTACTTGCTTAACACTCTTTGTAAC TCAA  
 TTTTCAAGTTACAAAAGTTGAAATATACTTTACAATAATGCAAGTAGTTCCTCC  
 AGCCATTAATAACAAAGCTGTAATTTGCTTCATGTTTAGATATTCTT**CCATCAACG**  
**GGTCTTACCTG**CCCCTTAAATAAATCTCTAAAGGGGAGATGCCACACGCCTAA  
 AATCATGTGATAGTCGGAACACCATATTCCAACTACGAATCCAAGATTCAATTGT  
 CTTGGGGGAAAC

### S3C. Sequence alignment of *gma-miR167i* and its target *Gma-LRPK*

|                    |     |                      |     |
|--------------------|-----|----------------------|-----|
| <i>gma-miR167i</i> | 20  | UCAACUUCGACGGUCGUACU | 1   |
|                    |     | .....                | ..  |
| <i>Gma-LRPK</i>    | 490 | AGUUGAAGCUGCCAUCAUCA | 509 |

#### *Gma-LRPK* sequence

>gi|571475916|ref|XM\_003534705.2| PREDICTED: Glycine max uncharacterized  
 LOC100779669 (LOC100779669), transcript variant X1, mRNA

AAATTAATAGTGGGGTCATATCATATTGGATTGTCAAATTATATGTCTATTGCAG  
 CCTCCTCATGCTGACCATCTCCAATTCCAAACCTTGAATGAAATGCAGAGGCAAA  
 ATCAGAGGTAATAATTGAGGATGAATAAGTGATGCATCCAATCAATTAAGCCAA  
 GTACAGACTTGAAGTTGGGCACTAACTACTGGTAAGGATTTCCCATGTGTGCATT  
 ATCTACATACCATGGGGTGTCTTTCTTCAAAAAGTCATAGCCAGATCAATCAGCTT  
 CCATGAAGAGAGAAAGAAGAGATCACAGAGAAAACTAACGGCATTCCATTGCT  
 GGAAGATCTAATCATCTCCACTGGTGGCAGTGACCAGTACCTTGCTCTTTTCTGT  
 GCAGCTAACACAGTATCCAACAACTGCATTCTGGAAGTTTAAGTTCTAACACTT  
 CCTCAAACTGGCCATTGAGCCTGCCAGTGCCAGTTCTGAAACTATCAAGA**AGTT**  
**GAAGCTGCCATCATCA**GCAAGACTAGGCCAAGGAGAAGGGAAACA AATTGAGA  
 GTGATAAGAACAGGTCCAAAAGTTGGCACCAATTTCCAGAACACATTGTGCAGT  
 CTCTTGCTCAGGAGAATTCATCTGGTTTTGAAGATAAACATGACTTGAGCTCCAA  
 GGGTGCTGCGCGTAGTAGGAGCTTTCACACATTGAAGGAATATGATGATATGGTT  
 AAAAAAATATGGTTGGCCGAATCCCTCACAGATCAGCAAAGTGAGTTAATGAT  
 GAAGAAGATGCTGGTTCAGGAGCTAATAACA ACTCATCATACTGAGGATAGGGAT  
 TGTGTCATCAAGAAGATGCAACCACCATGCTTAAACAAAAATTATTCATTGGAA  
 GAAATAGAAGAAAGAAAAGTAGTGAAGGAGACCGACA ACTTGAGTACAACATC  
 AGAAATCAGCACAGTAGCTACA ACTCCAAGTCCTAAAAGTCACATATCTAGTTC  
 AGGTATTAAGAATGAGGGAGTGGTTCCAAGCCATAAAACAAGCACAATTGAGAA  
 GGGAATTAAGAGAAAAGCTGTGGCAAAGAGGCTAGAATCACTTAGAATCC**CAAC**  
**CGGTGTCGAATATCCAGC**AATTGCTAGTCTTAGAGAATGGCTCCCTGCAAGTGA  
 ATATACTCTCCTGAATCCTATGTCACCCCAAAATTTGGCAGTTATTCTATCATGGA  
 CATTAGAAATGCAAATGAATCCAGTGAGGATTCTGTATTTAGTCCAGAGTTGGTG  
 TCTGCCTTTGAACAATGTATGCAAAA ACTTGAAGCAGATGAAGAAAACATTCTG  
 AAACAAATTGTAGAGAATGTGGAGGAAGAAAGTGAAGCAAGCAGCCCCAAGAA  
 AGAACACCATGCATAGAAAATCAAACA ACTGAAGGTGAATTTTGTTAATAATGG  
 ATAAATCATAGACAAAATTGTTATTTCTACTCCACTACTCTATTTTTCACATCTTC  
 AATGCCTGTATGCATGTGAATTTTCAGGTCACAATTTTTTTTTTAATTTGAGAGTA  
 TTCTGAGAAGAGATGCCAATTTACATGGCAGTGAATGTAAATGTACTATGCCTAC  
 ATCCAATGCCTTGACCACCTTTGTGTATCATATCATAGTTATAAAAAATTTGGAG  
 AAAACAATTTCTGTTGGA
